# Supplementary material for: Specific Effects of Chronic Dietary Exposure to Chlorpyrifos on Brain Gene Expression—A Mouse Study
Source: PubMed Central journal article supplement (PMC5713433; doi:10.3390/ijms18112467), 2017-11-20
Supplement: ijms-18-02467-s001.pdf [file ijms-18-02467-s001.pdf]

## Gene table: RT<sup>2</sup> Profiler PCR Array

| UniGene   | GenBank      | Symbol  | Description                                                  |
|-----------|--------------|---------|--------------------------------------------------------------|
| Mm.250866 | NM_013467    | Aldh1a1 | Aldehyde dehydrogenase family 1, subfamily A1                |
| Mm.384171 | NM_007462    | Apc     | Adenomatosis polyposis coli                                  |
| Mm.277585 | NM_007471    | App     | Amyloid beta (A4) precursor protein                          |
| Mm.321755 | NM_009723    | Atp2b2  | ATPase, Ca <sup>++</sup> transporting, plasma membrane 2     |
| Mm.260900 | NM_009125    | Atxn2   | Ataxin 2                                                     |
| Mm.485508 | NM_029705    | Atxn3   | Ataxin 3                                                     |
| Mm.29586  | NM_027395    | Basp1   | Brain abundant, membrane attached signal protein 1           |
| Mm.1442   | NM_007540    | Bdnf    | Brain derived neurotrophic factor                            |
| Mm.260881 | NM_012061    | Cadps   | Ca <sup>2+</sup> -dependent secretion activator              |
| Mm.1051   | NM_009807    | Casp1   | Caspase 1                                                    |
| Mm.34405  | NM_009810    | Casp3   | Caspase 3                                                    |
| Mm.35687  | NM_007611    | Casp7   | Caspase 7                                                    |
| Mm.336851 | NM_009812    | Casp8   | Caspase 8                                                    |
| Mm.88829  | NM_015733    | Casp9   | Caspase 9                                                    |
| Mm.89845  | NM_145436    | Cdc27   | Cell division cycle 27 homolog (S. cerevisiae)               |
| Mm.1022   | NM_009861    | Cdc42   | Cell division cycle 42 homolog (S. cerevisiae)               |
| Mm.441131 | NM_007667    | Cdh8    | Cadherin 8                                                   |
| Mm.255241 | NM_007694    | Chgb    | Chromogranin B                                               |
| Mm.291707 | NM_029402    | Cul2    | Cullin 2                                                     |
| Mm.17537  | NM_028868    | Cxxc1   | CXXC finger 1 (PHD domain)                                   |
| Mm.12906  | NM_016672    | Ddc     | Dopa decarboxylase                                           |
| Mm.157069 | NM_010052    | Dlk1    | Delta-like 1 homolog (Drosophila)                            |
| Mm.41970  | NM_010077    | Drd2    | Dopamine receptor D2                                         |
| Mm.140619 | NM_053207    | Egln1   | EGL nine homolog 1 (C. elegans)                              |
| Mm.28584  | NM_023605    | Fbxo9   | F-box protein 9                                              |
| Mm.7995   | NM_010200    | Fgf13   | Fibroblast growth factor 13                                  |
| Mm.193099 | NM_010233    | Fn1     | Fibronectin 1                                                |
| Mm.101909 | NM_001081141 | Gabbr2  | Gamma-aminobutyric acid (GABA) B receptor, 2                 |
| Mm.396102 | NM_028803    | Gbe1    | Glucan (1,4-alpha-), branching enzyme 1                      |
| Mm.409670 | NM_010338    | Gpr37   | G protein-coupled receptor 37                                |
| Mm.327681 | NM_016886    | Gria3   | Glutamate receptor, ionotropic, AMPA3 (alpha 3)              |
| Mm.239865 | NM_008300    | Hspa4   | Heat shock protein 4                                         |
| Mm.214351 | NM_172812    | Htr2a   | 5-hydroxytryptamine (serotonin) receptor 2A                  |
| Mm.328720 | NM_010606    | Kcnj6   | Potassium inwardly-rectifying channel, subfamily J, member 6 |
| Mm.37558  | NM_025730    | Lrrk2   | Leucine-rich repeat kinase 2                                 |
| Mm.68933  | NM_016961    | Mapk9   | Mitogen-activated protein kinase 9                           |
| Mm.1287   | NM_010838    | Mapt    | Microtubule-associated protein tau                           |
| Mm.301039 | NM_010881    | Ncoa1   | Nuclear receptor coactivator 1                               |
| Mm.1956   | NM_010910    | Nefl    | Neurofilament, light polypeptide                             |
| Mm.326702 | NM_182716    | Nfasc   | Neurofascin                                                  |
| Mm.3507   | NM_013613    | Nr4a2   | Nuclear receptor subfamily 4, group A, member 2              |
| Mm.425766 | NM_172544    | Nrxn3   | Neurexin III                                                 |
| Mm.260117 | NM_008740    | Nsf     | N-ethylmaleimide sensitive fusion protein                    |
| Mm.7414   | NM_010942    | Nsg1    | Neuron specific gene family member 1                         |
| Mm.130054 | NM_008745    | Ntrk2   | Neurotrophic tyrosine kinase, receptor, type 2               |

| UniGene   | GenBank      | Symbol   | Description                                                                                 |
|-----------|--------------|----------|---------------------------------------------------------------------------------------------|
| Mm.274285 | NM_133752    | Opa1     | Optic atrophy 1 homolog (human)                                                             |
| Mm.244183 | NM_133992    | Pan2     | PAN2 polyA specific ribonuclease subunit homolog (S. cerevisiae)                            |
| Mm.311110 | NM_016694    | Park2    | Parkinson disease (autosomal recessive, juvenile) 2, parkin                                 |
| Mm.277349 | NM_020569    | Park7    | Parkinson disease (autosomal recessive, early onset) 7                                      |
| Mm.18539  | NM_026880    | Pink1    | PTEN induced putative kinase 1                                                              |
| Mm.295252 | NM_026352    | Ppid     | Peptidylprolyl isomerase D (cyclophilin D)                                                  |
| Mm.347009 | NM_011563    | Prdx2    | Peroxiredoxin 2                                                                             |
| Mm.330850 | NM_011183    | Psen2    | Presenilin 2                                                                                |
| Mm.245395 | NM_008960    | Pten     | Phosphatase and tensin homolog                                                              |
| Mm.41642  | NM_009062    | Rgs4     | Regulator of G-protein signaling 4                                                          |
| Mm.221275 | NM_153457    | Rtn1     | Reticulon 1                                                                                 |
| Mm.235998 | NM_009115    | S100b    | S100 protein, beta polypeptide, neural                                                      |
| Mm.20365  | NM_213614    | Sept5    | Septin 5                                                                                    |
| Mm.42944  | NM_011543    | Skp1a    | S-phase kinase-associated protein 1A                                                        |
| Mm.353923 | NM_172523    | Slc18a2  | Solute carrier family 18 (vesicular monoamine), member 2                                    |
| Mm.16228  | NM_007450    | Slc25a4  | Solute carrier family 25 (mitochondrial carrier, adenine nucleotide translocator), member 4 |
| Mm.41993  | NM_010020    | Slc6a3   | Solute carrier family 6 (neurotransmitter transporter, dopamine), member 3                  |
| Mm.40322  | NM_015748    | Slit1    | Slit homolog 1 (Drosophila)                                                                 |
| Mm.17484  | NM_009221    | Snca     | Synuclein, alpha                                                                            |
| Mm.299906 | NM_019763    | Spen     | SPEN homolog, transcriptional regulator (Drosophila)                                        |
| Mm.292016 | NM_146083    | Srsf7    | Serine/arginine-rich splicing factor 7                                                      |
| Mm.277599 | NM_019719    | Stub1    | STIP1 homology and U-Box containing protein 1                                               |
| Mm.273082 | NM_153579    | Sv2b     | Synaptic vesicle glycoprotein 2 b                                                           |
| Mm.26032  | NM_011522    | Syngn3   | Synaptogyrin 3                                                                              |
| Mm.289702 | NM_009306    | Syt1     | Synaptotagmin I                                                                             |
| Mm.379376 | NM_018804    | Syt11    | Synaptotagmin XI                                                                            |
| Mm.139815 | NM_009333    | Tcf7l2   | Transcription factor 7-like 2, T-cell specific, HMG-box                                     |
| Mm.1292   | NM_009377    | Th       | Tyrosine hydroxylase                                                                        |
| Mm.20864  | NM_011627    | Tpbp     | Trophoblast glycoprotein                                                                    |
| Mm.1104   | NM_009457    | Uba1     | Ubiquitin-like modifier activating enzyme 1                                                 |
| Mm.331    | NM_019639    | Ubc      | Ubiquitin C                                                                                 |
| Mm.240044 | NM_011665    | Ube2i    | Ubiquitin-conjugating enzyme E2I                                                            |
| Mm.319512 | NM_016786    | Ube2k    | Ubiquitin-conjugating enzyme E2K (UBC1 homolog, yeast)                                      |
| Mm.3074   | NM_009456    | Ube2l3   | Ubiquitin-conjugating enzyme E2L 3                                                          |
| Mm.29807  | NM_011670    | Uchl1    | Ubiquitin carboxy-terminal hydrolase L1                                                     |
| Mm.119155 | NM_001190401 | Usp34    | Ubiquitin specific peptidase 34                                                             |
| Mm.32321  | NM_009496    | Vamp1    | Vesicle-associated membrane protein 1                                                       |
| Mm.227704 | NM_011696    | Vdac3    | Voltage-dependent anion channel 3                                                           |
| Mm.3360   | NM_011740    | Ywhaz    | Tyrosine 3-monooxygenase/tryptophan 5-monooxygenase activation protein, zeta polypeptide    |
| Mm.328431 | NM_007393    | Actb     | Actin, beta                                                                                 |
| Mm.163    | NM_009735    | B2m      | Beta-2 microglobulin                                                                        |
| Mm.343110 | NM_008084    | Gapdh    | Glyceraldehyde-3-phosphate dehydrogenase                                                    |
| Mm.3317   | NM_010368    | Gusb     | Glucuronidase, beta                                                                         |
| Mm.2180   | NM_008302    | Hsp90ab1 | Heat shock protein 90 alpha (cytosolic), class B member 1                                   |
